# Supplementary material
Source: publisher figshare collection journal article supplement (https://acs.figshare.com/ndownloader/files/5731320)
Supplement: Supplementary file 1 [file 5731320]

## SUPPORTING INFORMATION

**C2-Hydroxyglycosylation with Glycal Donors. Probing the Mechanism of Sulfonium-Mediated Oxygen Transfer to Glycal Enol Ethers.***Eiji Honda and David Y. Gin\***Department of Chemistry, University of Illinois at Urbana-Champaign, Urbana, IL 61801  
gin@scs.uiuc.edu*

**General Procedures.** All reactions were performed in flame-dried modified Schlenk (Kjeldahl shape) flasks fitted with a glass stopper or rubber septa under a positive pressure of argon, unless otherwise noted. Low temperature NMR experiments were performed in 5 mm NMR tubes (dried under a stream of N<sub>2</sub> gas) topped with a rubber septa under a positive pressure of argon. Air- and moisture-sensitive liquids and solutions were transferred via syringe or stainless steel cannula. Organic solutions were concentrated by rotary evaporation below 30 °C at *ca.* 25 Torr. Flash column chromatography was performed employing 230-400 mesh silica gel. Thin-layer chromatography (analytical and preparative) was performed using glass plates pre-coated to a depth of 0.25 mm with 230-400 mesh silica gel impregnated with a fluorescent indicator (254 nm).

**Materials.** Dichloromethane, diisopropylethylamine, triethylamine, and acetonitrile were distilled from calcium hydride at 760 Torr. CD<sub>2</sub>Cl<sub>2</sub> was stored over CaH<sub>2</sub> and vacuum transferred immediately prior to use. Methyl alcohol was distilled from Mg/I<sub>2</sub>. <sup>18</sup>O-Labeled diphenyl sulfoxide (Ph<sub>2</sub>S<sup>18</sup>O), and <sup>18</sup>O-labeled dibenzothiophene oxide (DBT<sup>18</sup>O) were prepared following literature procedures.<sup>1</sup> Trifluoromethanesulfonic anhydride (Tf<sub>2</sub>O) was triply distilled from phosphorous pentoxide.

**Instrumentation.** Infrared (IR) spectra were obtained using a Perkin-Elmer Spectrum BX spectrophotometer referenced to polystyrene standard. Data are presented as frequency of

absorption ( $\text{cm}^{-1}$ ). Proton and carbon-13 nuclear magnetic resonance ( $^1\text{H}$  NMR or  $^{13}\text{C}$  NMR) spectra were recorded on a Varian 500, and a Varian Inova 500 NMR spectrometer; chemical shifts are expressed in parts per million ( $\delta$  scale) downfield from tetramethylsilane and are referenced to residual protium in the NMR solvent ( $\text{CHCl}_3$ ,  $\delta_{\text{H}}$  7.26;  $\text{CHDCl}_2$ ,  $\delta_{\text{H}}$  5.32;  $\text{CDCl}_3$ ,  $\delta_{\text{C}}$  77.0;  $\text{CD}_2\text{Cl}_2$ ,  $\delta_{\text{C}}$  53.8). Data are presented as follows: chemical shift, multiplicity (s = singlet, d = doublet, t = triplet, m = multiplet and/or multiple resonances), integration, coupling constant in Hertz (Hz) and assignment. Melting points were recorded with a Fisher melting point apparatus and are uncorrected.

***tert*-Butyl 3,4,6-tri-*O*-benzyl- $\beta$ -D-glucopyranoside.** Colorless oil:  $R_f$  = 0.22 (17% ethyl acetate in hexane);  $[\alpha]_{\text{D}}^{20}$  =  $-5.9$  ( $c$  = 1.3,  $\text{CHCl}_3$ );  $^1\text{H}$  NMR (500 MHz,  $\text{CDCl}_3$ )  $\delta$  7.40-7.18 (m, 15 H), 4.97 (d, 1H,  $J$  = 11.1 Hz), 4.85 (d, 1H,  $J$  = 11.1 Hz), 4.83 (d, 1H,  $J$  = 11.2 Hz), 4.60 (d, 1H,  $J$  = 12.0 Hz), 4.55 (d, 1H,  $J$  = 11.0 Hz), 4.54 (d, 1H,  $J$  = 12.1 Hz), 4.43 (d, 1H,  $J$  = 8.72 Hz, H1), 3.72 (dd, 1H,  $J$  = 10.7 and 1.9 Hz), 3.65 (dd, 1H,  $J$  = 10.8 and 5.1 Hz), 3.56 (t, 1H,  $J$  = 9.2 Hz), 3.51 (dd, 1H,  $J$  = 8.8 and 8.0 Hz), 3.49 (ddd, 1H,  $J$  = 9.9 and 5.1 and 1.9 Hz), 2.25 (bs, 1H, ), 1.31 (s, 9H);  $^{13}\text{C}$  NMR (126 MHz,  $\text{CDCl}_3$ )  $\delta$  138.90, 138.42, 138.34, 128.52, 128.49, 128.24, 128.05, 127.83, 127.77, 127.74, 127.62, 97.41, 84.94, 77.81, 76.28, 75.05, 75.04, 74.96, 73.44, 69.37, 28.92; FTIR (neat film) 3499, 3087, 3062, 3029, 2976, 2905, 2870, 1495, 1455, 1364, 1112, 1062  $\text{cm}^{-1}$ ; HRMS (FAB)  $m/z$ : Calcd for  $\text{C}_{31}\text{H}_{37}\text{O}_6$  (M-H) 505.2590, found 505.2593.

**Benzyl 3,4,6-tri-*O*-benzyl- $\beta$ -D-glucopyranosylamine.** White solid: mp 123-124  $^{\circ}\text{C}$  (from ethanol) (lit: 117-119  $^{\circ}\text{C}$ );  $R_f$  = 0.28 (30% ethyl acetate in hexane);  $[\alpha]_{\text{D}}^{20}$  =  $-11.0$  ( $c$  = 1.34,  $\text{CHCl}_3$ ) (lit:  $[\alpha]_{\text{D}}^{20}$  =  $-7.13$ ,  $c$  = 2.3,  $\text{CHCl}_3$ );  $^1\text{H}$  NMR (500 MHz,  $\text{CDCl}_3$ )  $\delta$  7.40-7.27 (m, 18H), 7.16-7.15 (m, 2H), 4.98 (d, 1H,  $J$  = 11.3 Hz), 4.85 (d, 1H,  $J$  = 10.8 Hz), 4.82 (d, 1H,  $J$  = 11.3 Hz), 4.66 (d, 1H,  $J$  = 12.3 Hz), 4.56 (d, 1H,  $J$  = 12.2 Hz), 4.51 (d, 1H,  $J$  = 10.8 Hz), 4.14 (d, 1H,  $J$  = 13.4 Hz), 3.88 (d, 1H,  $J$  = 13.2 Hz), 3.88 (d, 1H,  $J$  = 8.4 Hz, H1), 3.77-3.71 (m, 2H),

3.67-3.58 (m, 2H), 3.45-3.42 (m, 1H), 3.38 (t, 1H,  $J = 8.5$  Hz), 2.69 (bs, 1H), 1.97 (bs, 1H);  $^{13}\text{C}$  NMR (126 MHz,  $\text{CDCl}_3$ )  $\delta$  139.61, 138.81, 138.27, 138.07, 128.49, 128.40, 128.37, 128.28, 127.99, 127.91, 127.90, 127.70, 127.69, 127.61, 127.20, 89.76, 85.58, 77.43, 76.24, 74.99, 74.90, 74.88, 73.55, 68.86, 49.54; FTIR (neat film) 3527, 3279, 3063, 3032, 2900, 2865, 1496, 1451, 1398, 1348, 1314, 1258, 1210, 1122, 1064, 1019, 843  $\text{cm}^{-1}$ ; HRMS (FAB)  $m/z$ : Calcd for  $\text{C}_{34}\text{H}_{38}\text{NO}_5$  (M+H) 540.2750, found 540.2751.

**Methyl *O*-(3,4,6-tri-*O*-benzyl- $\beta$ -D-glucopyranosyl)-(1 $\rightarrow$ 6)-2,3,4-tri-*O*-benzyl- $\alpha$ -D-glucopyranoside.** White solid: mp 135-136  $^{\circ}\text{C}$  (from methanol-benzene);  $R_f = 0.40$  (20% ethyl acetate in benzene);  $[\alpha]_{\text{D}}^{20} = +14.0$  ( $c = 1.17$ ,  $\text{CHCl}_3$ );  $^1\text{H}$  NMR (500 MHz,  $\text{CDCl}_3$ )  $\delta$  7.37-7.26 (m, 28H), 7.19-7.15 (m, 2H), 4.98 (d, 1H,  $J = 10.8$  Hz), 4.91 (d, 1H,  $J = 11.1$  Hz), 4.89 (d, 1H,  $J = 10.7$  Hz), 4.82 (d, 1H,  $J = 11.1$  Hz), 4.82 (d, 1H,  $J = 10.8$  Hz), 4.81 (d, 1H,  $J = 11.1$  Hz), 4.78 (d, 1H,  $J = 13.8$  Hz), 4.66 (d, 1H,  $J = 12.2$  Hz), 4.61 (d, 1H,  $J = 11.5$  Hz), 4.61 (d, 1H,  $J = 3.2$  Hz, H1'), 4.58 (d, 1H,  $J = 12.4$  Hz), 4.52 (d, 1H,  $J = 9.8$  Hz), 4.52 (d, 1H,  $J = 12.6$  Hz), 4.23 (d, 1H,  $J = 7.2$  Hz, H1), 4.15 (dd, 1H,  $J = 10.9$  and  $2.2$  Hz), 4.00 (t, 1H,  $J = 9.3$  Hz), 3.84-3.80 (m, 1H), 3.72 (dd, 1H,  $J = 11.0$  and  $1.9$  Hz), 3.70-3.65 (m, 2H), 3.57-3.48 (m, 5H), 3.46-3.43 (m, 1H), 3.37 (s, 3H);  $^{13}\text{C}$  NMR (126 MHz,  $\text{CDCl}_3$ )  $\delta$  138.70, 138.62, 138.24, 138.17, 138.08, 138.06, 128.50, 128.45, 128.42, 128.41, 128.36, 128.17, 128.00, 127.97, 127.94, 127.84, 127.79, 127.77, 127.73, 127.71, 127.65, 127.59, 103.50, 98.09, 84.45, 81.99, 79.68, 78.01, 77.47, 75.79, 75.33, 75.10, 75.04, 75.02, 74.47, 73.43, 73.38, 69.79, 68.94, 68.78, 55.28; FTIR (neat film) 3472, 3088, 3062, 3030, 2903, 2869, 1497, 1454, 1360, 1090, 1066, 1028  $\text{cm}^{-1}$ ; HRMS (FAB)  $m/z$ : Calcd for  $\text{C}_{55}\text{H}_{59}\text{O}_{11}$  (M-H) 895.4057, found 895.4056.

**Benzyl 3,4,6-tri-*O*-*para*-methoxybenzyl- $\beta$ -D-glucopyranoside.** White solid: mp 104-105  $^{\circ}\text{C}$  (from ethanol);  $R_f = 0.24$  (30% ethyl acetate in hexane);  $[\alpha]_{\text{D}}^{20} = -27.8$  ( $c = 0.91$ ,  $\text{CHCl}_3$ );

$^1\text{H}$  NMR (500 MHz,  $\text{CDCl}_3$ )  $\delta$  7.38-7.27 (m, 9H), 7.09-7.06 (m, 2H), 6.88-6.85 (m, 4H), 6.84-6.81 (m, 2H), 4.95 (d, 1H,  $J = 11.7$  Hz), 4.83 (d, 1H,  $J = 11.0$  Hz), 4.77 (d, 1H,  $J = 11.2$  Hz), 4.74 (d, 1H,  $J = 10.4$  Hz), 4.62 (d, 1H,  $J = 11.7$  Hz), 4.58 (d, 1H,  $J = 11.8$  Hz), 4.49 (d, 1H,  $J = 11.9$  Hz), 4.44 (d, 1H,  $J = 10.4$  Hz), 4.34 (d, 1H,  $J = 7.5$  Hz, H1), 3.80 (s, 3H), 3.79 (s, 3H), 3.78 (s, 3H), 3.71 (dd, 1H,  $J = 10.8$  and 2.0 Hz), 3.66 (dd, 1H,  $J = 10.8$  and 4.6 Hz), 3.61-3.52 (m, 3H), 3.45 (ddd, 1H,  $J = 9.2, 4.6$  and 2.1 Hz), 2.29 (d, 1H,  $J = 2.0$  Hz);  $^{13}\text{C}$  NMR (126 MHz,  $\text{CDCl}_3$ )  $\delta$  159.50, 159.48, 159.45, 137.41, 131.03, 130.49, 130.41, 129.85, 129.81, 129.74, 128.70, 128.35, 128.16, 114.09, 113.98, 101.93, 84.43, 77.51, 75.44, 74.99, 74.87, 78.81, 73.32, 71.26, 68.62, 55.47, 55.45; FTIR (neat film) 3435, 3069, 3033, 3002, 2918, 2960, 2836, 1612, 1585, 1517, 1464, 1361, 1301, 1250, 1064, 1035  $\text{cm}^{-1}$ ; HRMS (FAB)  $m/z$ : Calcd for  $\text{C}_{37}\text{H}_{41}\text{O}_9$  (M-H) 629.2751, found 629.2750.

**Phenyl 3-*O*-benzyl-4,6-di-*O*-isopropylidene- $\beta$ -D-glucopyranoside.** Viscous oil:  $R_f = 0.39$  (15% ethyl acetate in benzene);  $[\alpha]_D^{20} = -22.4$  ( $c = 1.35$ ,  $\text{CHCl}_3$ );  $^1\text{H}$  NMR (500 MHz,  $\text{CDCl}_3$ )  $\delta$  7.41-7.28 (m, 7H), 7.07-7.02 (m, 3H), 4.99 (d, 1H,  $J = 7.6$  Hz, H1), 4.93 (d, 1H,  $J = 11.6$  Hz), 4.79 (d, 1H,  $J = 11.8$  Hz), 3.96 (dd, 1H,  $J = 11.0$  and 5.4 Hz), 3.84-3.77 (m, 3H), 3.59 (t, 1H,  $J = 9.0$  Hz), 3.40 (dt, 1H,  $J = 9.9$  and 5.3 Hz), 2.53 (bs, 1H), 1.50 (s, 3H), 1.45 (s, 3H);  $^{13}\text{C}$  NMR (126 MHz,  $\text{CDCl}_3$ )  $\delta$  156.96, 138.61, 129.58, 128.46, 127.92, 127.79, 123.08, 116.93, 101.25, 99.50, 80.72, 74.42, 73.93, 73.88, 67.50, 62.17, 29.13, 19.07; FTIR (neat film) 3479, 3063, 3030, 2996, 2886, 1590, 1496, 1318, 1306, 1229, 1157, 1091  $\text{cm}^{-1}$ ; HRMS (FAB)  $m/z$ : Calcd for  $\text{C}_{22}\text{H}_{27}\text{O}_6$  (M+H) 387.1808, found 387.1811.

**Methyl 4-*O*-acetyl-1-*O*-allyl-3-*O*-*tert*-butyldimethylsilyl-D-glucuronate (11).** Viscous oil:  $R_f = 0.41$  (17% ethyl acetate in benzene);  $^1\text{H}$  NMR (400 MHz,  $\text{CDCl}_3$ )  $\delta$  5.91 (dddd, 1H,  $J = 17.1, 11.8, 6.6, 5.3$  Hz), 5.31 (ddd, 1H,  $J = 17.3, 3.1, 1.6$  Hz), 5.23 (dq, 1H,  $J = 1.03, 1.3$  Hz),

4.98 (dd, 1H,  $J = 10.0, 9.1$  Hz), 4.41 (ddt, 1H,  $J = 12.7, 5.2, 1.4$  Hz), 4.33 (d, 1H,  $J = 7.9$  Hz), 4.09 (ddt, 1H,  $J = 12.6, 6.5, 1.3$  Hz), 3.73 (s, 3H), 3.73 (t, 1H,  $J = 9.0$  Hz), 3.48 (ddd, 1H,  $J = 9.0, 7.9, 2.7$  Hz), 2.38 (d, 1H,  $J = 2.8$  Hz), 2.06 (s, 9H), 0.85 (s, 3H), 0.07 (s, 3H);  $^{13}\text{C}$  NMR (100 MHz,  $\text{CDCl}_3$ )  $\delta$  169.93, 168.27, 133.53, 118.61, 101.64, 74.70, 74.31, 73.13, 72.32, 70.75, 52.99, 25.84, 21.09, 18.29, -4.11, -4.64; FTIR (neat film) 3518, 2955, 2930, 2888, 2857, 1753, 1373, 1249, 1234, 1114, 1034, 839, 780  $\text{cm}^{-1}$ ; HRMS (FAB)  $m/z$ : Calcd for  $\text{C}_{18}\text{H}_{32}\text{O}_8\text{SiNa}$  ( $\text{M}+\text{Na}$ ) 427.1764, found 427.1766.

**Isopropyl 3,4,6-tri-*O*-benzyl- $\beta$ -D-galactopyranoside.** Viscous oil:  $R_f$  0.36 (33% ethyl acetate in hexane);  $^1\text{H}$  NMR (500 MHz,  $\text{CDCl}_3$ )  $\delta$  7.38-7.23 (m, 15H, ArH), 4.89 (d, 1H,  $J = 11.4$  Hz, benzylic-H), 4.73 (d, 1H,  $J = 11.9$  Hz, benzylic-H), 4.69 (d, 1H,  $J = 11.8$  Hz, benzylic-H), 4.62 (d, 1H,  $J = 11.4$  Hz, benzylic-H), 4.47 (d, 1H,  $J = 11.4$  Hz, benzylic-H), 4.43 (d, 1H,  $J = 11.4$  Hz, benzylic-H), 4.28 (d, 1H,  $J = 7.7$  Hz, H-1), 3.99 (septet, 1H,  $J = 6.3$  Hz,  $\text{CH}(\text{CH}_3)_2$ ), 3.94-3.90 (m, 2H), 3.64-3.55 (m, 3H), 3.44 (dd, 1H,  $J = 9.9, 3.0$  Hz), 2.31 (d, 1H,  $J = 1.3$  Hz, OH), 1.25 (d, 3H,  $J = 6.3$  Hz,  $\text{CH}(\text{CH}_3)_2$ ), 1.18 (d, 3H,  $J = 6.3$  Hz,  $\text{CH}(\text{CH}_3)_2$ );  $^{13}\text{C}$  NMR (126 MHz,  $\text{CDCl}_3$ )  $\delta$  138.79, 138.45, 138.16, 128.72, 128.67, 128.59, 128.40, 128.11, 128.03, 127.96, 127.86, 127.78, 101.82, 82.27, 74.71, 73.97, 73.76, 73.21, 72.68, 71.78, 71.60, 69.10, 23.67, 22.04; FTIR (neat film) 3450, 3086, 3061, 3028, 2972, 2921, 2868, 1690, 1495, 1455, 1382, 1100, 1069  $\text{cm}^{-1}$ ; HRMS (FAB)  $m/z$ : Calcd for  $\text{C}_{30}\text{H}_{37}\text{O}_6$  ( $\text{M}+\text{H}$ ) 493.2590, found 493.2590.

**3,4,6-Tri-*O*-benzyl-D-[1- $^{13}\text{C}$ ]-glucal (3a).** To a suspension of D-[1- $^{13}\text{C}$ ]-glucose (**14a**) (151 mg, 0.83 mmol, 1 equiv) in  $\text{Ac}_2\text{O}$  (550  $\mu\text{L}$ , 5.83 mmol, 7 equiv) was added HBr (33% in AcOH, 100  $\mu\text{L}$ , 0.58 mmol, 0.7 equiv), and the mixture was stirred at 23  $^\circ\text{C}$  for 1 h. After 1 h, the reaction mixture was treated with additional HBr (33% in AcOH, 650  $\mu\text{L}$ , 3.76 mmol, 4.5

equiv) and stirred at 23 °C for 14 h. Sodium acetate (334 mg, 4.07 mmol, 5 equiv) was then added to the reaction, and then resulting reaction mixture was added to a suspension of zinc powder (2.08 g, 31.9 mmol, 38 equiv), CuSO<sub>4</sub>·5H<sub>2</sub>O (53 mg, 0.2 mmol, 0.25 equiv), and NaOAc (1.56 g) in a mixture of H<sub>2</sub>O (1.7 mL) and AcOH (2.5 mL). The reaction suspension was stirred vigorously at 23 °C for 1.5 h, then filtered, and the solid was washed sequentially with ethyl acetate (17 mL) and H<sub>2</sub>O (17 mL). The filtrate was partitioned and organic layer was washed sequentially with saturated aqueous NaHCO<sub>3</sub> solution (17 mL) and saturated aqueous sodium chloride solution (8 mL). The organic phase was dried (Na<sub>2</sub>SO<sub>4</sub>) and concentrated to provide a residue of crude tri-acetyl-D-glucal. A mixture of this residue, PhCH<sub>2</sub>Cl (3.2 mL, 27.8 mmol, 33 equiv), and powdered KOH (1.152 g, 20.5 mmol, 25 equiv) was vigorously stirred at 110 °C for 2 h and then cooled to 23 °C. The reaction mixture was diluted with toluene (9 mL) and H<sub>2</sub>O (4.5 mL), partitioned, and the organic layer was washed with H<sub>2</sub>O (3 × 4.5 mL). Toluene was removed under reduce pressure at 95 °C, and the residue was purified by flash column chromatography (9% ethyl acetate in hexane) to afford 3,4,6-tri-*O*-benzyl-D-[1-<sup>13</sup>C]-glucal (199 mg, 57%) as white needles (from ethyl acetate-hexane), mp 52-53 °C; *R*<sub>f</sub> = 0.38 (20% ethyl acetate in hexane); <sup>1</sup>H NMR (500 MHz, CD<sub>2</sub>Cl<sub>2</sub>) δ 7.34-7.27 (m, 15H, ArH), 6.41 (ddd, 1H, <sup>4</sup>*J*<sub>H,H</sub> = 1.1, <sup>3</sup>*J*<sub>H,H</sub> = 6.2, <sup>1</sup>*J*<sub>C,H</sub> = 188.0 Hz, H-1), 4.90 (dt, 1H, <sup>3</sup>*J*<sub>H,H</sub> = 2.8, 5.8 Hz, <sup>2</sup>*J*<sub>C,H</sub> = 5.8 Hz, H-2), 4.81 (d, 1H, *J* = 11.2 Hz, benzylic-H), 4.65 (d, 1H, *J* = 11.4 Hz, benzylic-H), 4.63 (d, 1H, *J* = 11.6 Hz, benzylic-H), 4.56 (d, 1H, *J* = 11.8 Hz, benzylic-H), 4.54 (d, 1H, *J* = 11.6 Hz, benzylic-H), 4.53 (d, 1H, *J* = 12.0 Hz, benzylic-H), 4.19-4.16 (m, 1H, H-3), 4.08-4.05 (m, 1H, H-5), 3.822 (dd, 1H, *J* = 6.0, 8.4 Hz, H-4), 3.816 (dd, 1H, *J* = 5.1, 10.9 Hz, H-6), 3.75 (dd, 1H, *J* = 2.8, 10.7 Hz, H-6); <sup>13</sup>C NMR (126 MHz, CD<sub>2</sub>Cl<sub>2</sub>) δ 144.81 (C-1), 139.02, 138.86, 138.68, 128.67, 128.64, 128.22, 128.09, 127.98, 127.92, 127.88, 100.21 (d, <sup>1</sup>*J*<sub>C,C</sub> = 76.0 Hz, C-2), 77.09

(d,  $J = 2.8$  Hz), 75.70, 74.81 (d,  $J = 3.8$  Hz), 73.89, 73.67, 70.68, 68.98 (d,  $J = 1.6$  Hz); FTIR (neat film) 3030, 2864, 1952, 1871, 1813, 1621, 1496, 1454, 1361, 1233, 1100, 735, 697  $\text{cm}^{-1}$ ; HRMS (FAB)  $m/z$ : Calcd for  $^{12}\text{C}_{39}^{13}\text{C}_1\text{H}_{28}\text{O}_4$  (M) 416.1941, found 416.1943.

**3,4,6-Tri-*O*-benzyl-D-[2- $^{13}\text{C}$ ]-glucal (3b).** Prepared from D-[2- $^{13}\text{C}$ ]-glucose (**14b**) in a procedure identical to that for the preparation of **3a**. **3b**: White needles (from ethyl acetate-hexane), mp 52 °C;  $R_f = 0.38$  (20% ethyl acetate in hexane);  $^1\text{H}$  NMR (500 MHz,  $\text{CD}_2\text{Cl}_2$ )  $\delta$  7.34-7.26 (m, 15H, ArH), 6.41 (ddd, 1H,  $^4J_{\text{H,H}} = 1.3$ ,  $^3J_{\text{H,H}} = 6.2$ ,  $^2J_{\text{C,H}} = 9.0$  Hz, H-1), 4.90 (ddd, 1H,  $^3J_{\text{H,H}} = 2.8$ , 6.2 Hz,  $^1J_{\text{C,H}} = 165.1$  Hz, H-2), 4.81 (d, 1H,  $J = 11.4$  Hz, benzylic-H), 4.65 (d, 1H,  $J = 11.4$  Hz, benzylic-H), 4.63 (d, 1H,  $J = 11.6$  Hz, benzylic-H), 4.56 (d, 1H,  $J = 11.8$  Hz, benzylic-H), 4.54 (d, 1H,  $J = 11.6$  Hz, benzylic-H), 4.52 (d, 1H,  $J = 12.0$  Hz, benzylic-H), 4.19-4.16 (m, 1H, H-3), 4.06 (ddd, 1H,  $J = 2.8$ , 5.4, 8.2 Hz, H-5), 3.84-3.81 (m, 1H, H-4), 3.82 (dd, 1H,  $J = 5.1$ , 10.7 Hz, H-6), 3.75 (dd, 1H,  $J = 2.8$ , 10.7 Hz, H-6);  $^{13}\text{C}$  NMR (126 MHz,  $\text{CD}_2\text{Cl}_2$ )  $\delta$  144.79 (d,  $^1J_{\text{C,C}} = 74.6$  Hz, C-1), 139.02, 138.86, 138.69, 128.67, 128.64, 128.22, 128.09, 127.98, 127.93, 127.88, 100.25 (C-2), 77.09 (d,  $J = 2.8$  Hz), 75.69 (d,  $J = 46.0$  Hz), 74.81, 73.89, 73.67, 70.68 (d,  $J = 1.8$  Hz), 68.99; FTIR (neat film) 3063, 3031, 2866, 1622, 1496, 1454, 1365, 1239, 1102, 736, 697  $\text{cm}^{-1}$ ; HRMS (FAB)  $m/z$ : Calcd for  $^{12}\text{C}_{39}^{13}\text{C}_1\text{H}_{28}\text{O}_4$  (M) 416.1941, found 416.1943.

**3,4,6-Tri-*O*- $d_7$ -benzyl-D-glucal ( $d_{21}$ -3).** To the solution of D-glucal (100 mg, 0.68 mmol, 1 equiv) in DMF (4 mL) was added NaH (60% dispersion in mineral oil, 110 mg, 2.74 mmol, 4 equiv) at 0°C and the reaction was stirred at this temperature for 0.5 h.  $d_7$ -Benzyl chloride (268  $\mu\text{L}$ , 2.40 mmol, 3.5 equiv) and TBAI (101 mg, 0.27 mmol, 0.4 equiv) were then added. The ice bath was removed and the reaction mixture was stirred at 23°C for 4 h. Excess NaH was neutralized with the addition of water (80 mL), and the mixture was extracted with  $\text{Et}_2\text{O}$  (4  $\times$  20

mL) and the combined organic layers were washed with saturated aqueous sodium chloride solution (25 mL), dried ( $\text{Na}_2\text{SO}_4$ ), and concentrated, and the residue was purified by flash column chromatography (9% ethyl acetate in hexane) to afford 3,4,6-tri-*O*- $d_7$ -benzyl-D-glucal (244 mg, 82%) as white needles (from ethyl acetate-hexane), mp 48-49 °C;  $R_f$  = 0.38 (20% ethyl acetate in hexane);  $^1\text{H}$  NMR (500 MHz,  $\text{CD}_2\text{Cl}_2$ )  $\delta$  6.41 (dd, 1H,  $J$  = 1.3, 6.2 Hz, H-1), 4.90 (dd, 1H,  $J$  = 2.8, 6.2 Hz, H-2), 4.17 (dddd, 1H,  $J$  = 0.6, 1.5, 2.8, 6.0 Hz, H-3), 4.06 (ddd, 1H,  $J$  = 2.8, 5.4, 8.1 Hz, H-5), 3.82 (dd, 1H,  $J$  = 5.2, 10.9 Hz, H-6), 3.81 (dd, 1H,  $J$  = 6.0, 8.4 Hz, H-4), 3.74 (dd, 1H,  $J$  = 2.8, 10.7 Hz, H-6);  $^{13}\text{C}$  NMR (126 MHz,  $\text{CD}_2\text{Cl}_2$ )  $\delta$  144.78, 100.28, 77.13, 75.65, 74.74, 68.89, 54.23, 54.01, 53.80, 53.58, 53.37; FTIR (neat film) 3066, 2871, 2276, 2173, 2107, 2061, 1649, 1456, 1393, 1328, 1287, 1245, 1205, 1184, 1106, 962, 870, 839, 820, 743  $\text{cm}^{-1}$ ; HRMS (FAB)  $m/z$ : Calcd for  $\text{C}_{27}\text{H}_7\text{D}_{21}\text{O}_4$  (M-H) 436.3229, found 436.3227.

**3,4,6-Tri-*O*-benzyl- $\beta$ -D-glucopyranosyl azide (4).**<sup>2</sup> To the solution of 3,4,6-tri-*O*-benzyl-D-glucal (3) (50 mg, 0.12 mmol, 1 equiv), diphenyl sulfoxide (73 mg, 0.36 mmol, 3 equiv) and 2,4,6-tri-*tert*-butylpyridine (104 mg, 0.42 mmol, 3.5 equiv) in dichloromethane (3.3 mL) was added trifluoromethanesulfonic anhydride (30  $\mu\text{L}$ , 0.18 mmol, 1.5 equiv) at -78 °C. The resulting solution was stirred at -78 °C for 30 min, and then at -40 °C for 1 h. Methyl alcohol (4.9  $\mu\text{L}$ , 0.12 mmol, 1 equiv) and triethylamine (50  $\mu\text{L}$ , 0.36 mmol, 3 equiv) were added sequentially at -40 °C. The solution was stirred at this temperature for 0.5 h, then at 0 °C for 0.5 h and finally at 23 °C for 1 h. The solvent was removed under reduce pressure at 0 °C, and the residue was then dissolved in dry  $\text{CH}_3\text{CN}$  (5 mL).  $\text{NaN}_3$  (23 mg, 0.35 mmol, 3 equiv) and  $\text{LiClO}_4$  (63 mg, 0.60 mmol, 5 equiv) were added sequentially to the reaction mixture at 0 °C, and the resulting suspension was stirred at 0 °C for 30 min, and then at 23 °C for 12 h. The reaction mixture was partitioned between dichloromethane (20 mL) and  $\text{H}_2\text{O}$  (20 mL) and the aqueous



layer was further extracted with dichloromethane ( $3 \times 10$  mL). The combined organic layers were dried ( $\text{Na}_2\text{SO}_4$ ) and concentrated, and the residue was purified by flash column chromatography (17% ethyl acetate in hexane) to afford 3,4,6-tri-*O*-benzyl- $\beta$ -D-glucopyranosyl azide (**4**) (44 mg, 77%) as white solid (from ethyl acetate-hexane), mp 63-64 °C;  $R_f$  = 0.60 (50% ethyl acetate in hexane);  $^1\text{H}$  NMR (500 MHz,  $\text{CDCl}_3$ )  $\delta$  7.37-7.28 (m, 13H, ArH), 7.18-7.17 (m, 2H, ArH), 4.89 (d, 1H,  $J$  = 11.4 Hz, benzylic-H), 4.84 (d, 1H,  $J$  = 11.2 Hz, benzylic-H), 4.82 (d, 1H,  $J$  = 10.7 Hz, benzylic-H), 4.63 (d, 1H,  $J$  = 12.2 Hz, benzylic-H), 4.56 (d, 1H,  $J$  = 10.7 Hz, benzylic-H), 4.55 (d, 1H,  $J$  = 12.2 Hz, benzylic-H), 4.53 (d, 1H,  $J$  = 8.6 Hz, H-1), 3.75 (dd, 1H,  $J$  = 2.6, 11.4 Hz, H-6), 3.73 (dd, 1H,  $J$  = 3.8, 11.2 Hz, H-6), 3.67 (dd, 1H,  $J$  = 9.0, 9.6 Hz, H-4), 3.55 (t, 1H,  $J$  = 9.0 Hz, H-3), 3.54 (ddd, 1H,  $J$  = 2.4, 3.9, 9.9 Hz, H-5), 3.45 (dt, 1H, 2.6, 8.8 Hz, H-2), 2.24 (d, 1H,  $J$  = 2.6 Hz, OH); MS (FAB)  $m/z$  (rel intensity, %) 498.2 (M+Na, 27), 472.3 (16), 177.1 (100); HRMS (FAB)  $m/z$ : Calcd for  $\text{C}_{27}\text{H}_{29}\text{N}_3\text{O}_5\text{Na}$  (M+Na) 498.2007, found 498.2005.

**3,4,6-Tri-*O*-benzyl- $\beta$ -D-[2- $^{18}\text{O}$ ]-glucopyranosyl azide (**4**( $^{18}\text{O}$ )).** Prepared from 3,4,6-tri-*O*-benzyl-D-glucal (**3**, 41.4 mg, 0.100 mmol) as above, employing  $\text{Ph}_2\text{S}^{18}\text{O}$  ( $^{18}\text{O}$  96% incorp.), as the sulfoxide reagent. **4**( $^{18}\text{O}$ ) (37.6 mg, 79%): MS (FAB)  $m/z$  (rel intensity, %) 500.1 (M+Na, 100), 498.1 (8), 474.1 (43), 181.1 (88).

**3,4,6-Tri-*O*-benzyl- $\alpha$ -D-mannopyranosyl azide (**16**).** To the solution of DBTO (120 mg, 0.6 mmol, 5 equiv) and 2,4,6-tri-*tert*-butylpyridine (15 mg, 0.06 mmol, 0.5 equiv) in dichloromethane (2.5 mL) was added trifluoromethanesulfonic anhydride (40  $\mu\text{L}$ , 0.24 mmol, 2 equiv) at -78 °C. The reaction was stirred at this temperature for 10 min, then at -45 °C for 1 h. The reaction mixture was re-cooled to -78 °C, and a solution of 3,4,6-tri-*O*-benzyl-D-glucal (**3**) (50 mg, 0.12 mmol, 1 equiv) in dichloromethane (2.5 mL) was added via cannula. The reaction

was stirred at  $-78\text{ }^{\circ}\text{C}$  for 1 h before the sequential addition of methyl alcohol (4.9  $\mu\text{L}$ , 0.12 mmol, 1 equiv) and  $i\text{Pr}_2\text{NEt}$  (122  $\mu\text{L}$ , 0.71 mmol, 6 equiv). The solution was stirred at  $-78\text{ }^{\circ}\text{C}$  for 10 min, then at  $-45\text{ }^{\circ}\text{C}$  for 10 min, and finally at  $0\text{ }^{\circ}\text{C}$  for 1 h. The solvent was removed under reduce pressure at  $0\text{ }^{\circ}\text{C}$ , and the residue was dissolved in dry  $\text{CH}_3\text{CN}$  (5 mL).  $\text{NaN}_3$  (24 mg, 0.36 mmol, 3 equiv) and  $\text{LiClO}_4$  (65 mg, 0.61 mmol, 5 equiv) were added sequentially to the reaction mixture at  $0\text{ }^{\circ}\text{C}$ , and the resulting suspension was stirred at  $0\text{ }^{\circ}\text{C}$  for 30 min, and then at  $23\text{ }^{\circ}\text{C}$  for 18 h. The reaction was partitioned between dichloromethane (50 mL) and  $\text{H}_2\text{O}$  (20 mL), the aqueous layer was further extracted with dichloromethane ( $3 \times 20\text{ mL}$ ). The combined organic layers were washed with  $\text{H}_2\text{O}$  ( $3 \times 15\text{ mL}$ ), dried ( $\text{Na}_2\text{SO}_4$ ) and concentrated, and the residue was purified by flash column chromatography (6% ethyl acetate in benzene then 11% ethyl acetate in benzene) to afford 3,4,6-tri-*O*-benzyl- $\alpha$ -D-mannopyranosyl azide (**16**) (41 mg, 72%) as yellow oil and 3,4,6-tri-*O*-benzyl- $\beta$ -D-glucopyranosyl azide (**4**) (8 mg, 13%). **16**:  $R_f$  = 0.73 (50% ethyl acetate in hexane);  $^1\text{H}$  NMR (500 MHz,  $\text{CDCl}_3$ )  $\delta$  7.37-7.28 (m, 13H, ArH), 7.20-7.17 (m, 2H, ArH), 5.46 (d, 1H,  $J = 2.0\text{ Hz}$ , H-1), 4.82 (d, 1H,  $J = 10.8\text{ Hz}$ , benzylic-H), 4.69 (d, 1H,  $J = 11.5\text{ Hz}$ , benzylic-H), 4.68 (d, 1H,  $J = 12.2\text{ Hz}$ , benzylic-H), 4.67 (d, 1H,  $J = 11.5\text{ Hz}$ , benzylic-H), 4.54 (d, 1H,  $J = 12.0\text{ Hz}$ , benzylic-H), 4.53 (d, 1H,  $J = 11.0\text{ Hz}$ , benzylic-H), 3.91-3.87 (m, 3H), 3.81-3.78 (m, 2H), 3.73 (dd, 1H,  $J = 1.7, 11.1\text{ Hz}$ ), 2.61 (d, 1H,  $J = 2.1\text{ Hz}$ , OH);  $^{13}\text{C}$  NMR (126 MHz,  $\text{CDCl}_3$ )  $\delta$  138.07, 138.00, 137.51, 128.58, 128.36, 128.33, 128.09, 127.89, 127.87, 127.85, 127.73, 127.62, 89.27, 79.17, 75.13, 73.62, 73.49, 73.28, 72.27, 68.48, 68.24; FTIR (neat film) 3436, 3064, 3031, 2917, 2113, 1606, 1496, 1454, 1363, 1318, 1245, 1211, 1120, 1028, 932, 843, 798, 736, 698  $\text{cm}^{-1}$ ; MS (FAB)  $m/z$  (rel intensity, %) 498.2 ( $\text{M}+\text{Na}$ , 36), 472.2 (8), 177.0 (100); HRMS (FAB)  $m/z$ : Calcd for  $\text{C}_{27}\text{H}_{29}\text{N}_3\text{O}_5\text{Na}$  ( $\text{M}+\text{Na}$ ) 498.2007, found 498.2005.

**3,4,6-Tri-*O*-benzyl- $\alpha$ -D-[2-<sup>18</sup>O]-mannopyranosyl azide (16(<sup>18</sup>O)).** Prepared from 3,4,6-tri-*O*-benzyl-D-glucal (**3**, 42.2 mg, 0.1 mmol) as above, employing DBT<sup>18</sup>O (<sup>18</sup>O 95% incorp.), as the sulfoxide reagent. **16(<sup>18</sup>O)** (35.5 mg, 73%): MS (FAB) *m/z* (rel intensity, %) 500.0 (M+Na, 78), 498.0 (8.5), 474.0 (74), 198.9 (90), 176.9 (100).

---

<sup>1</sup> Sato, Y.; Kunieda, N.; Kinoshita, M. *Chem. Lett.* **1972**, 1023-1025.

<sup>2</sup> Gordon, D. M.; Danishefsky, S. J. *Carbohydr. Res.* **1990**, 206, 361-366.
